# Supplementary material for: Iron derived from NCOA4-mediated ferritinophagy causes cellular senescence via the cGAS-STING pathway
Source: PubMed Central journal article supplement (PMC10657394; doi:10.1038/s41420-023-01712-7), 2023-11-18
Supplement: 41420_2023_1712_MOESM2_ESM.pdf [file 41420_2023_1712_MOESM2_ESM.pdf]

Figure 1H

Ctrol D-gal

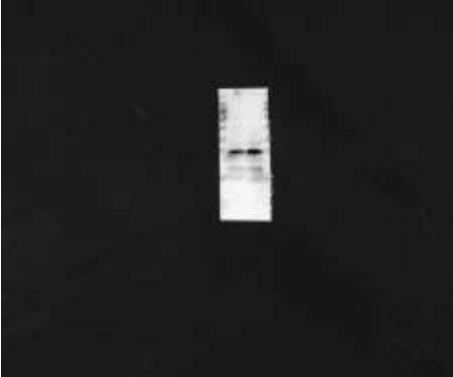

IFN-β

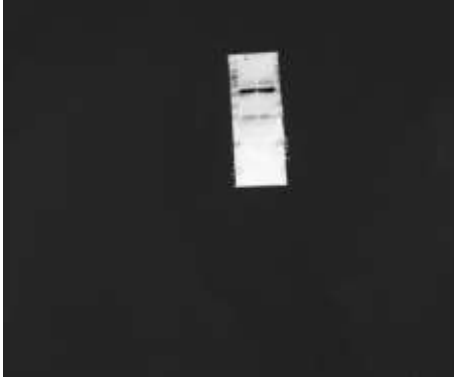

β-actin

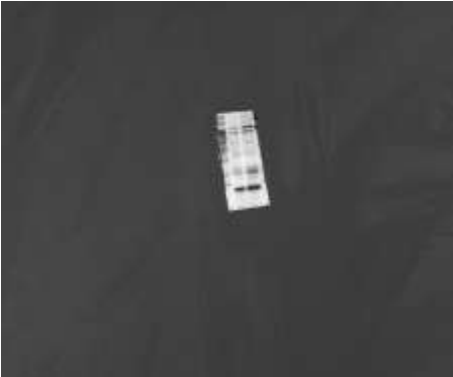

TNF-α

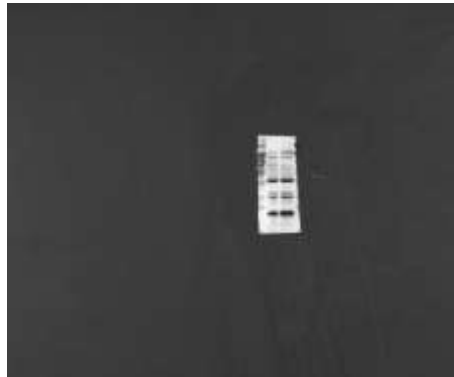

β-actin

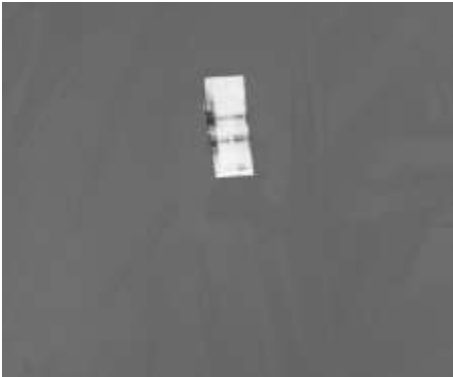

IL-6

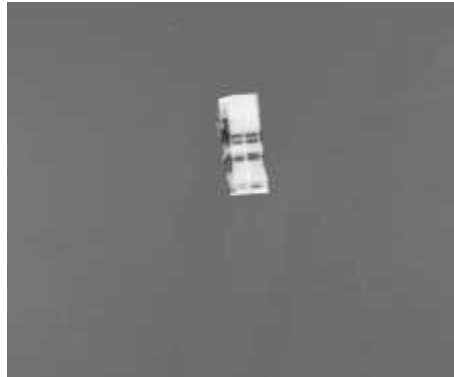

β-actin

Figure 2B

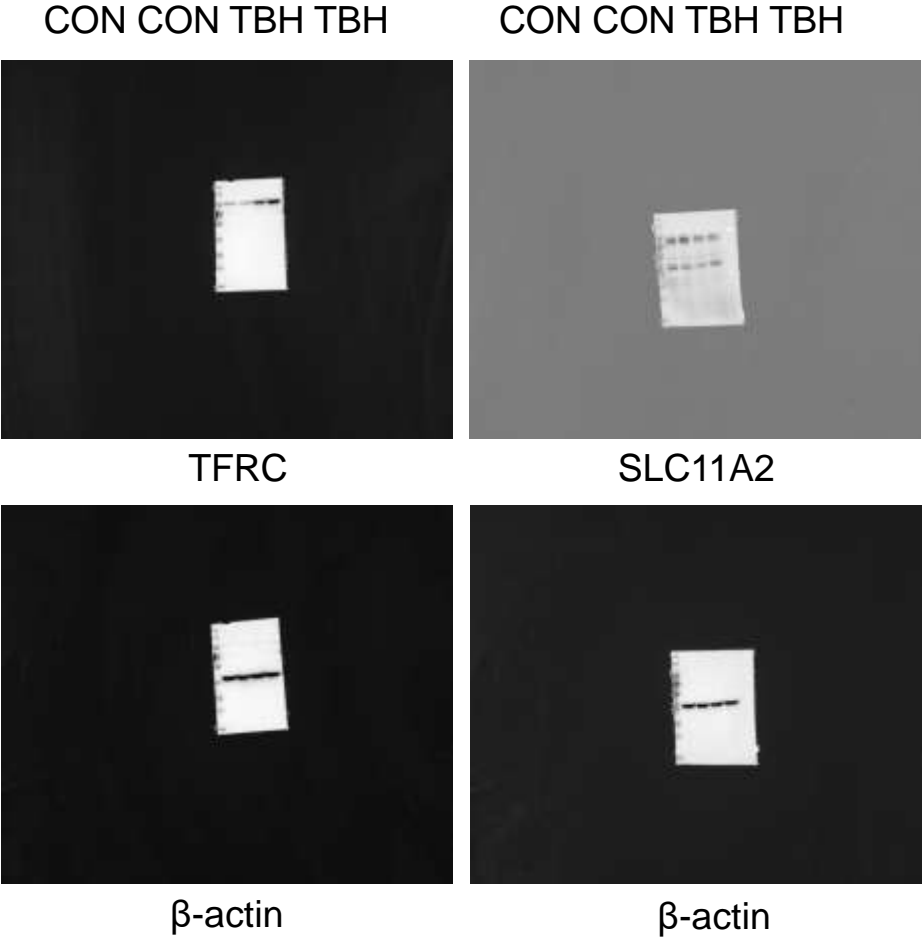

Figure 2B

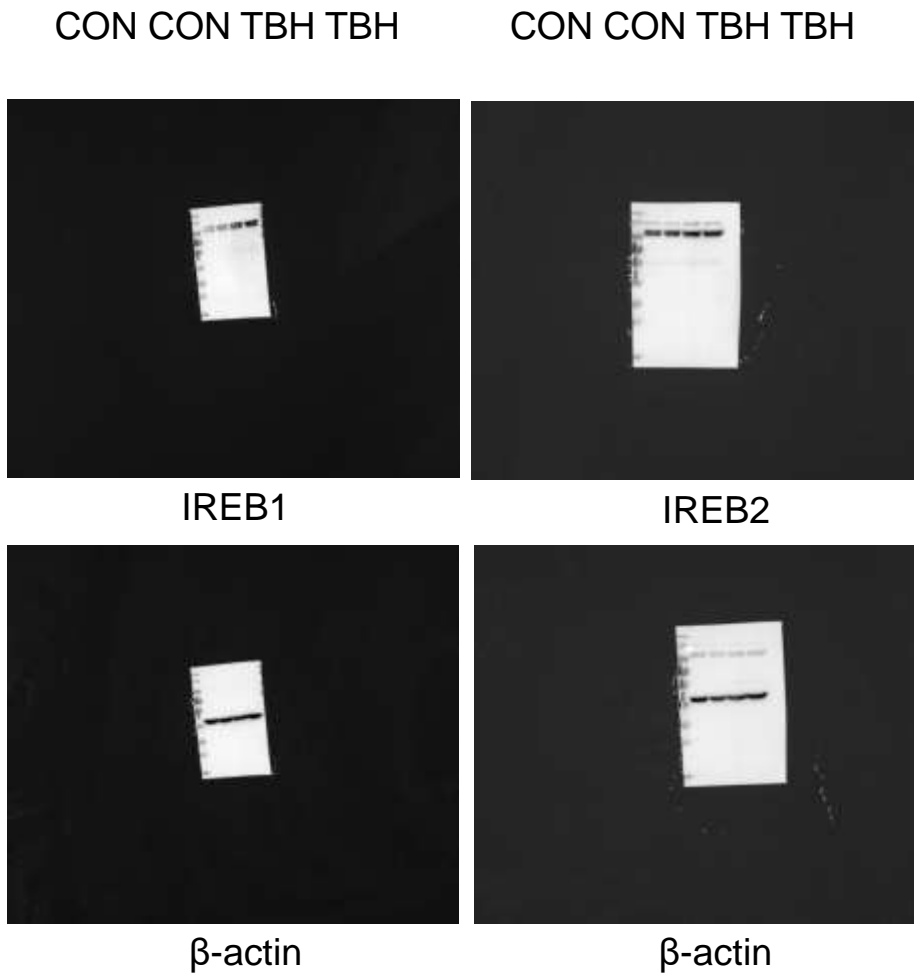

Figure 2B

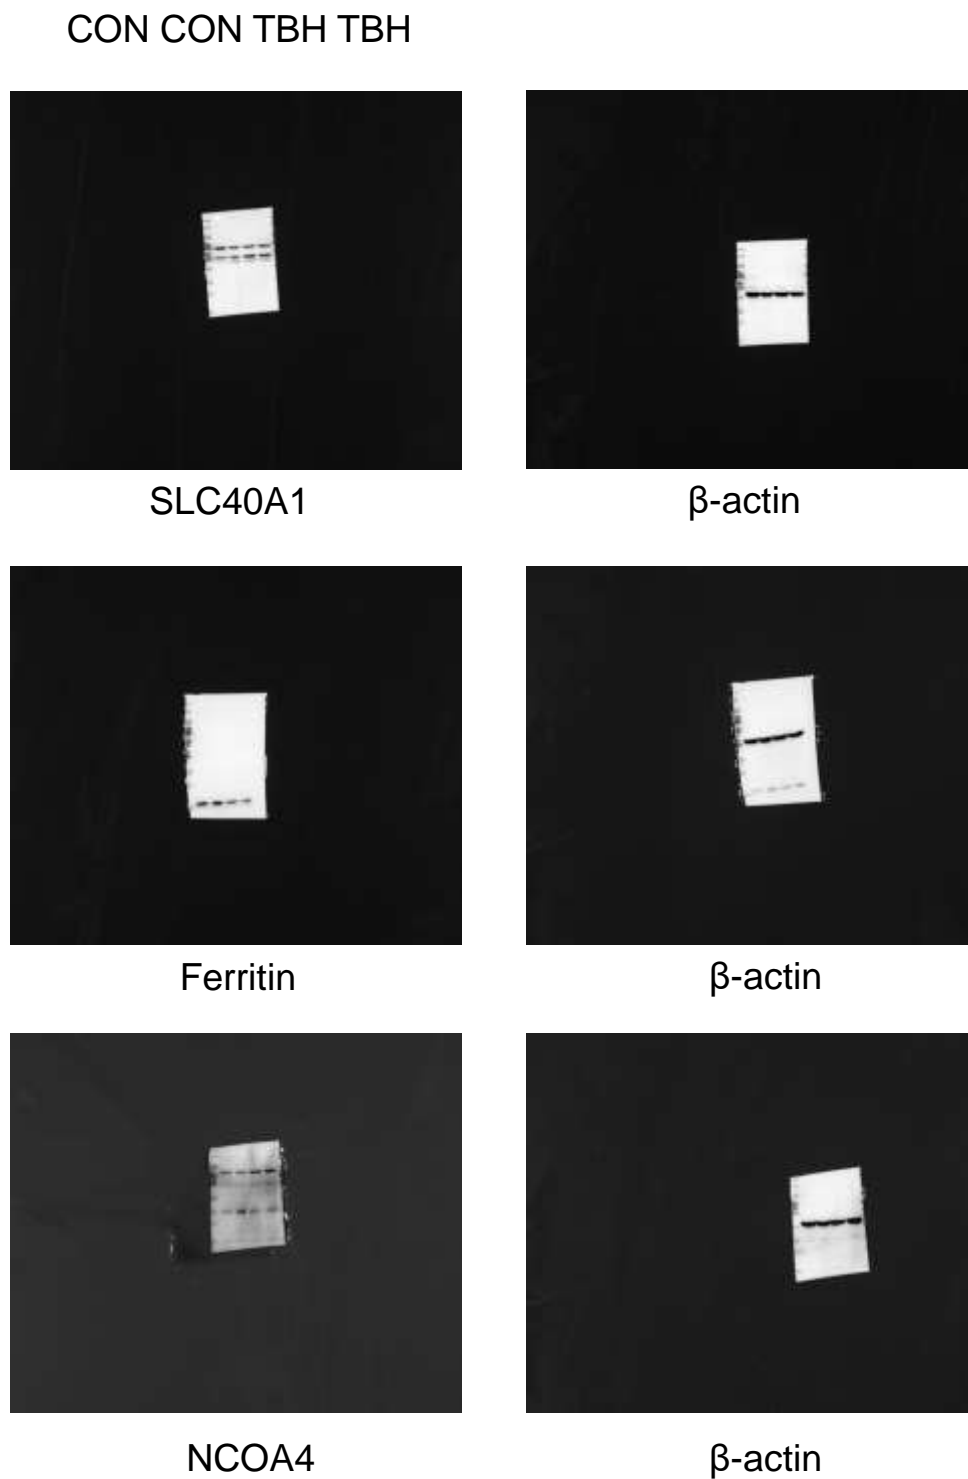

Figure S3A

CON NC siTFRC-1 siTFRC-2 siTFRC-3

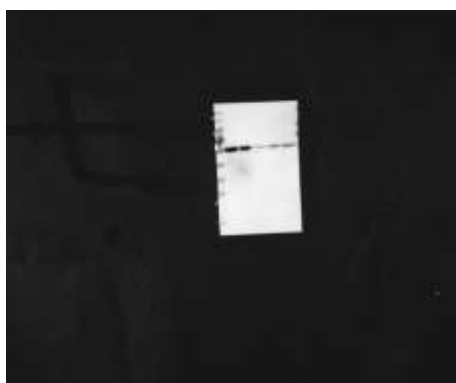

TFRC

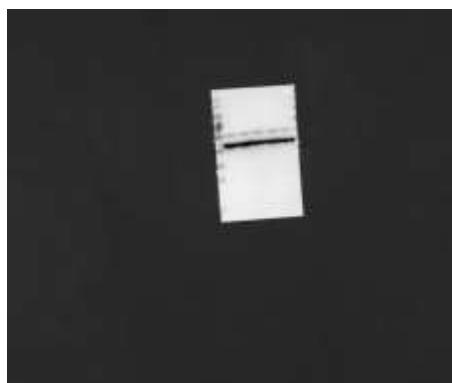

$\beta$ -actin

CON NC siNCOA4-1 siNCOA4-2 siNCOA4-3

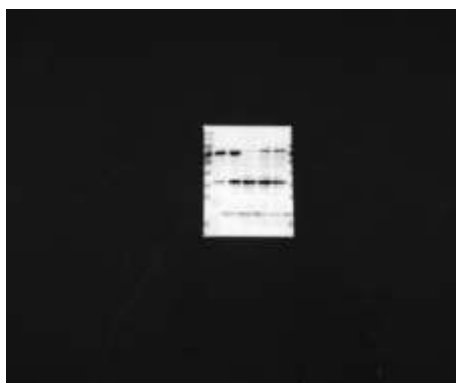

NCOA4

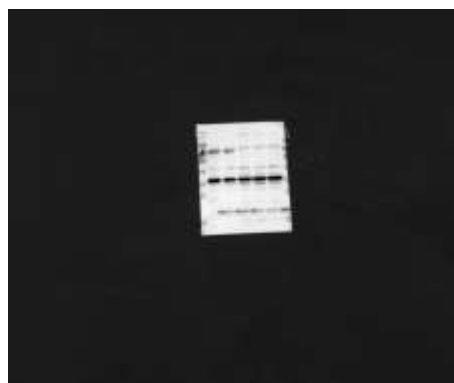

$\beta$ -actin

**Figure 2E**

CON TBH NC siNCOA4 siTFCR siSLC40A1

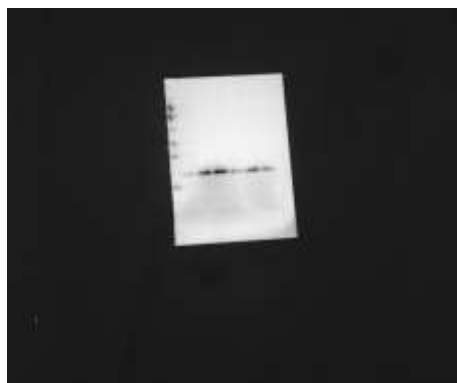

P21

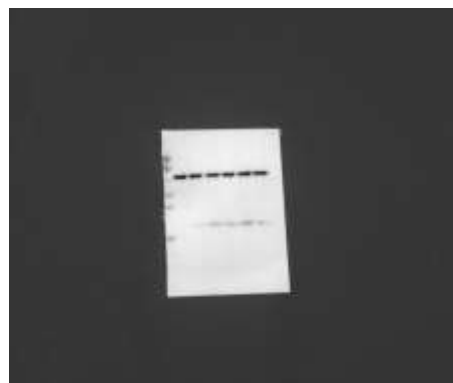

$\beta$ -actin

CON TBH NC siNCOA4 siTFCR siSLC40A1

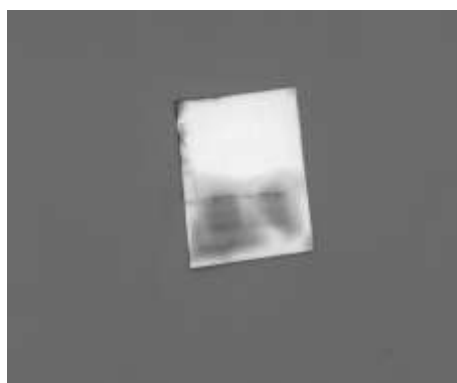

p-H2AX

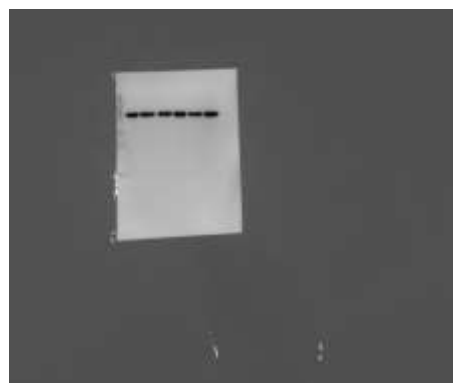

$\beta$ -actin

CON TBH NC siNCOA4 siTFCR siSLC40A1

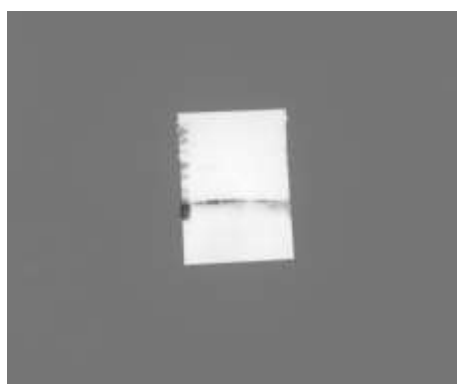

IL-6

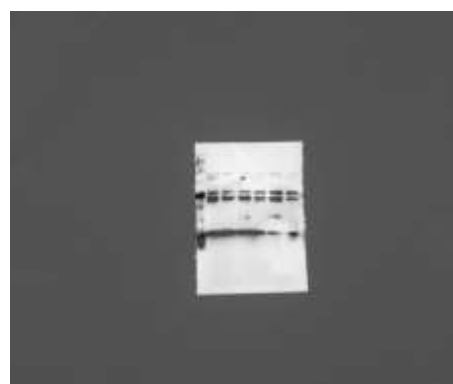

$\beta$ -actin

**Figure 3A**

CON TBH(6h) TBH(12h) TBH(24h) TBH(48h)

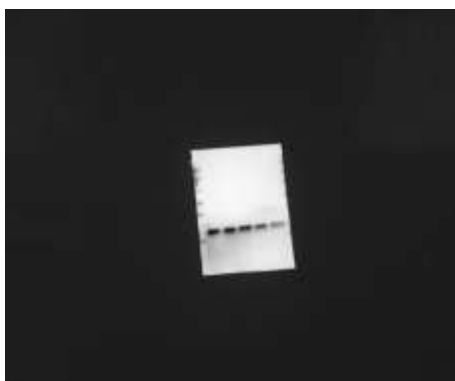

Ferritin

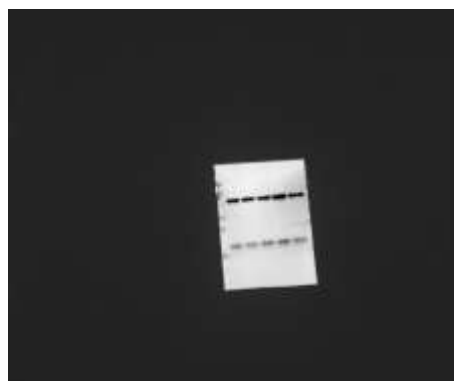

$\beta$ -actin

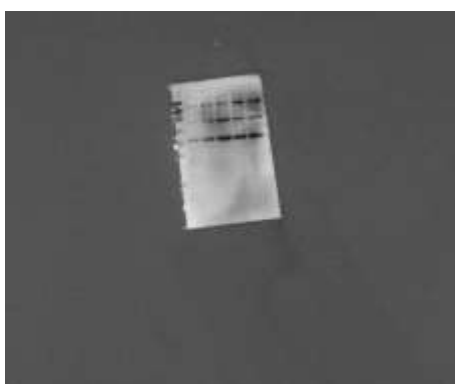

NCOA4

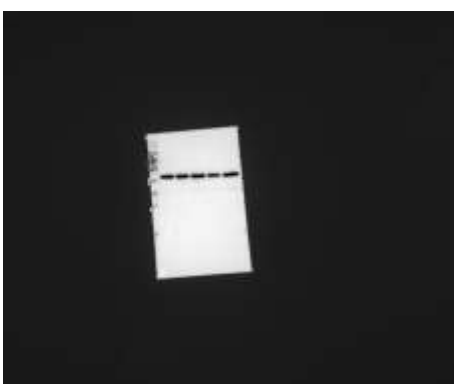

$\beta$ -actin

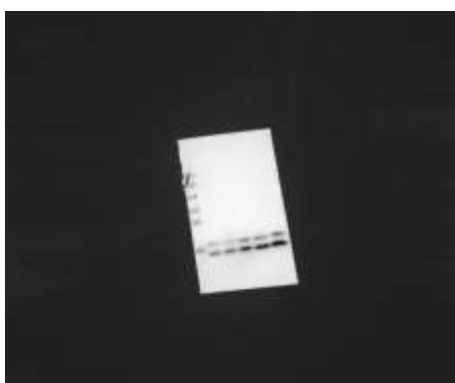

LC3B

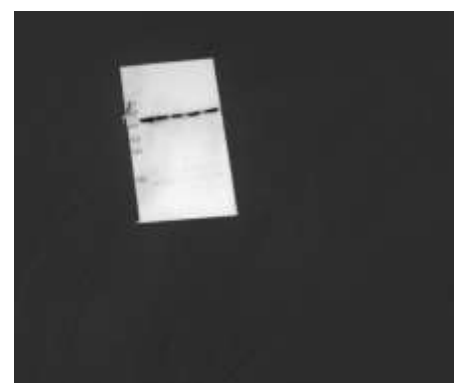

$\beta$ -actin

**Figure 3C**

CON TBH NC siNCOA4

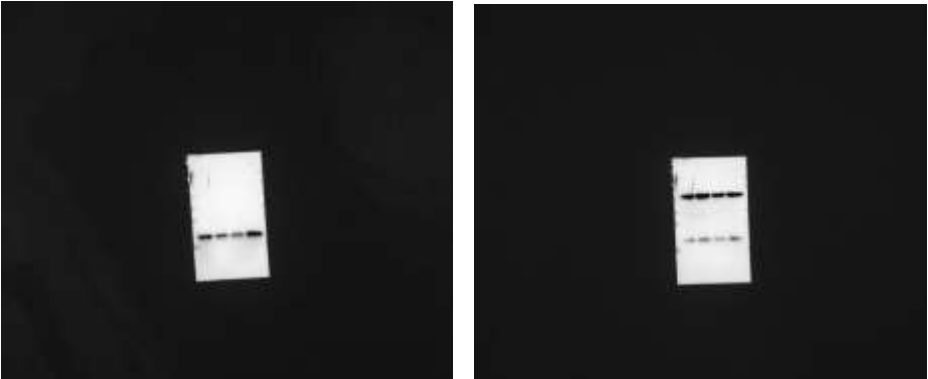

Ferritin

$\beta$ -actin

**Figure 3F**

CON NC Ferritin(+)

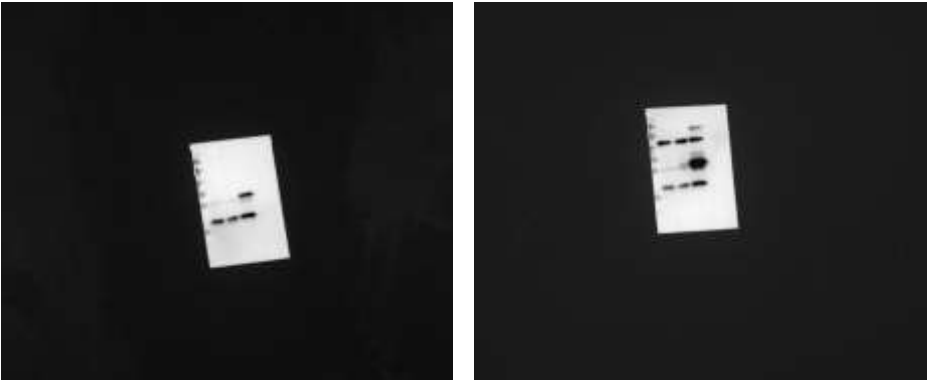

Ferritin

$\beta$ -actin



Figure 4B

CON CON FAC FAC FAC+DFO FAC+DFO

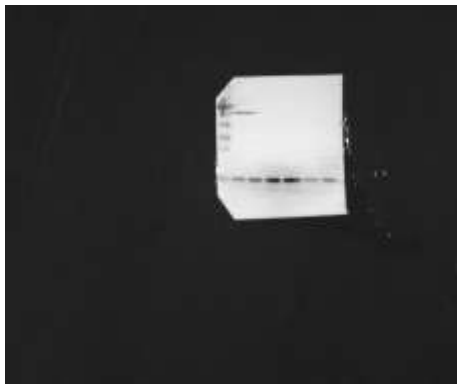

p-H2AX

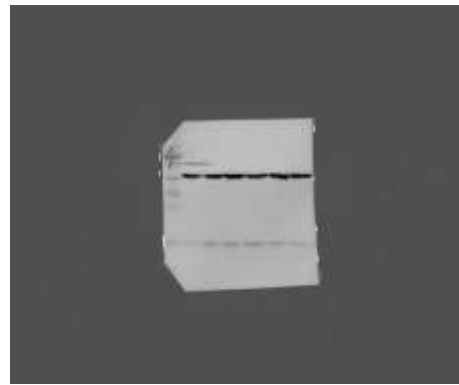

$\beta$ -actin

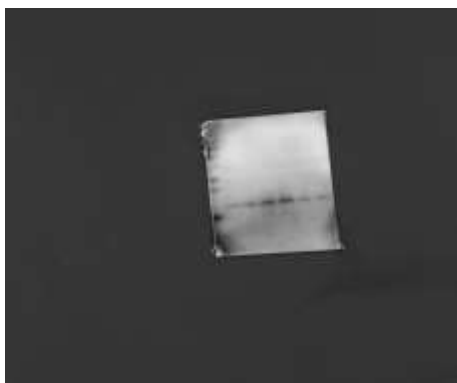

P21

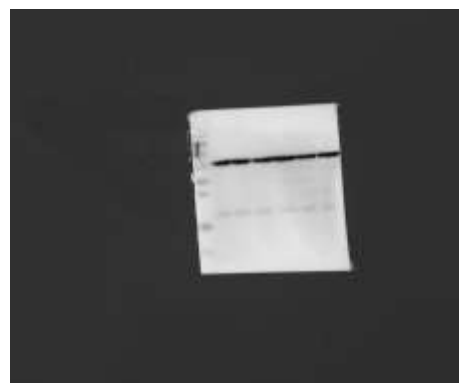

$\beta$ -actin

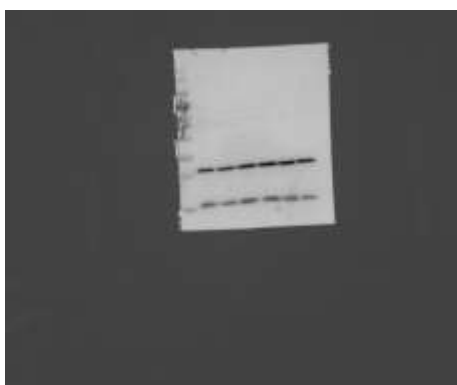

IL-6

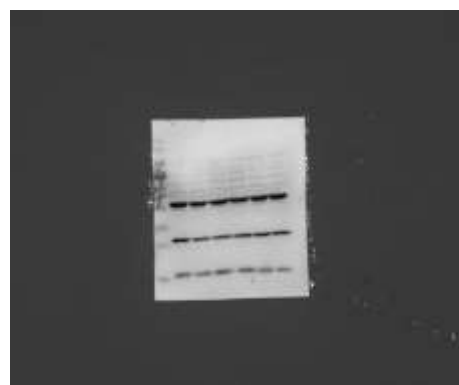

$\beta$ -actin

Figure 4E

CON CON TBH TBH TBH+DFO TBH+DFO

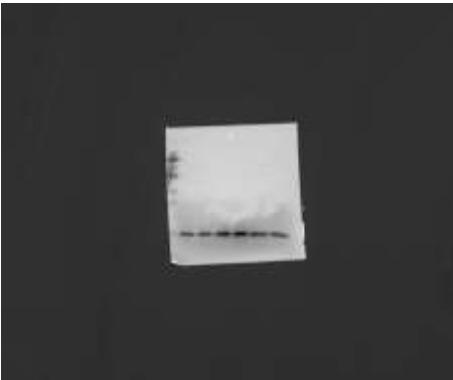

p-H2AX

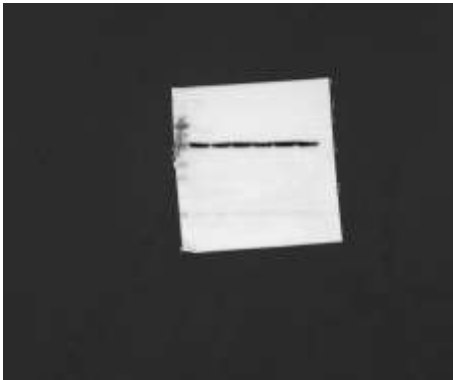

β-actin

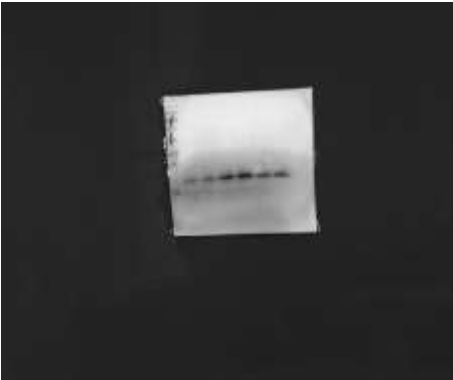

P21

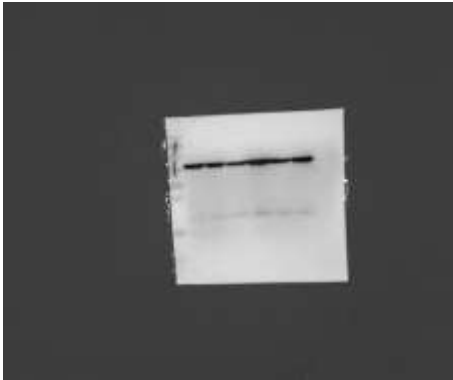

β-actin

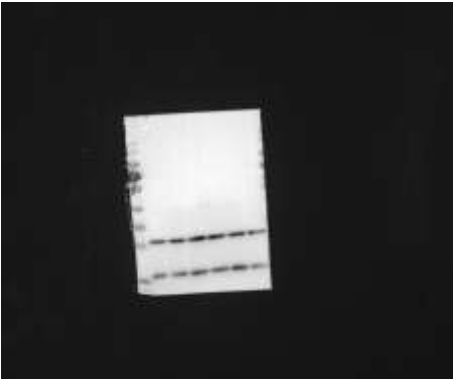

IL-6

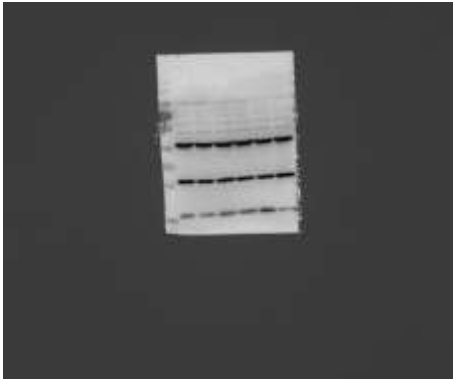

β-actin

Figure 4J

CON CON FAC FAC FAC+DFO FAC+DFO

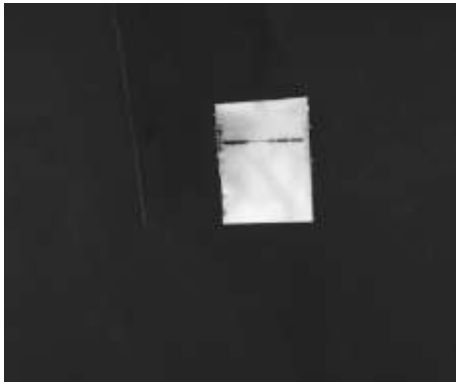

ATP5A1

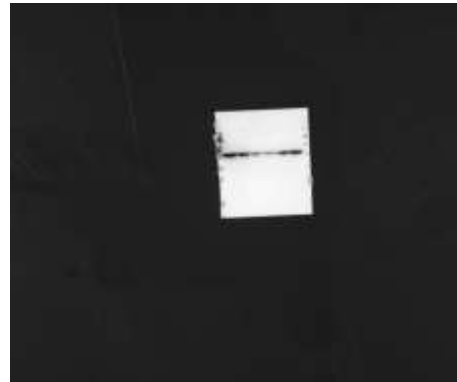

UQCRC2

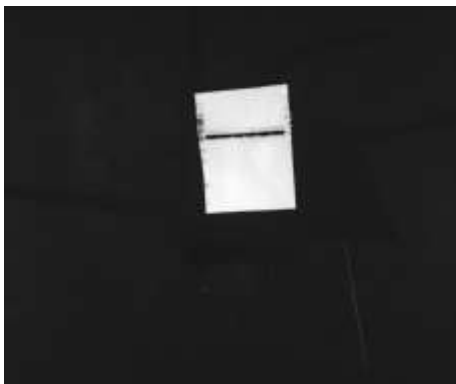

$\beta$ -actin

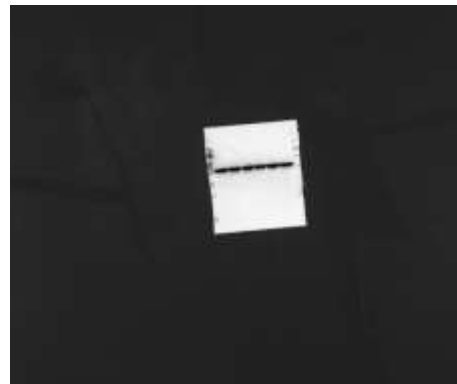

$\beta$ -actin

Figure 4J

CON CON FAC FAC FAC+DFO FAC+DFO

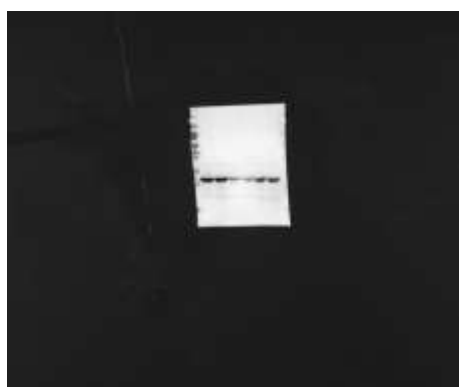

SDHB

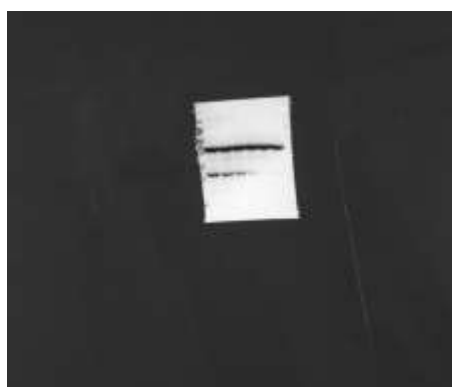

$\beta$ -actin

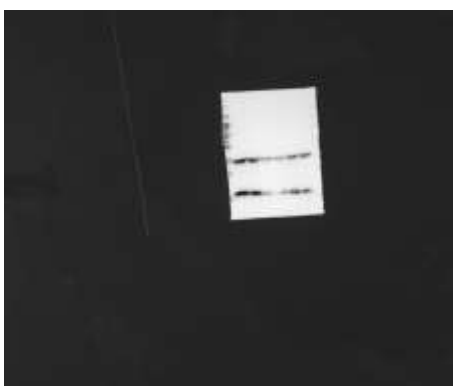

NDUFB8

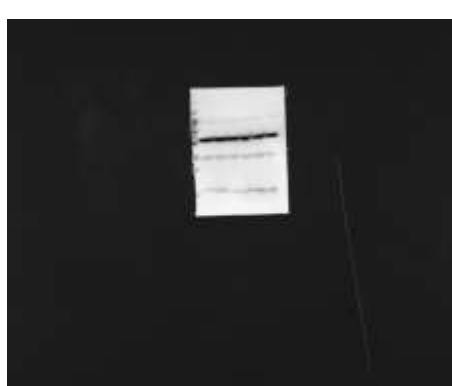

$\beta$ -actin

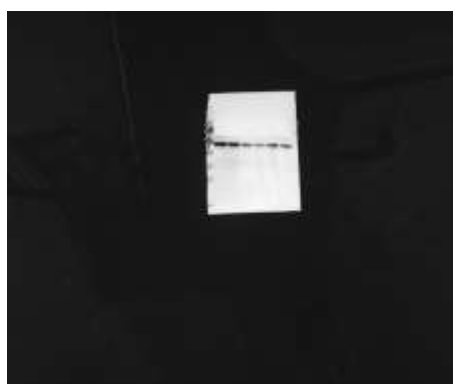

MTCO1

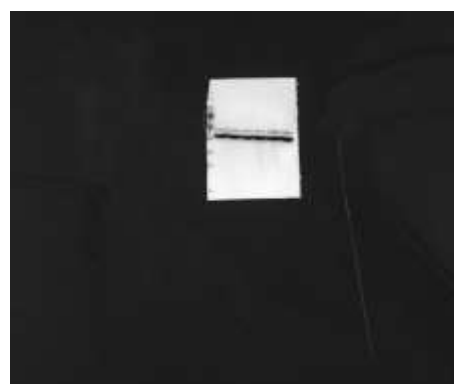

$\beta$ -actin

Figure 4L

CON CON FAC FAC

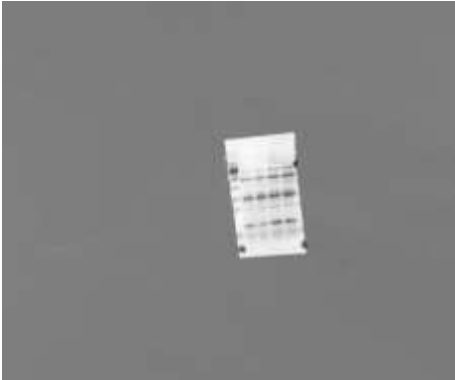

cGAS

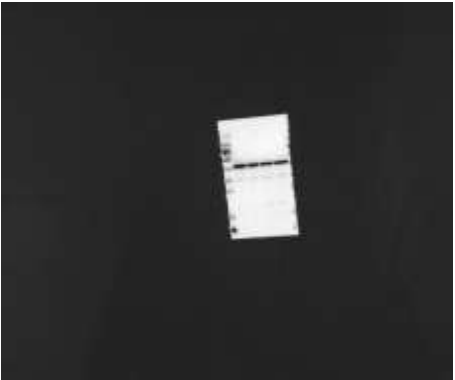

$\beta$ -actin

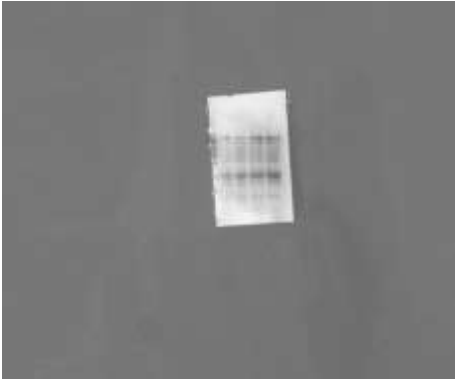

p-STING

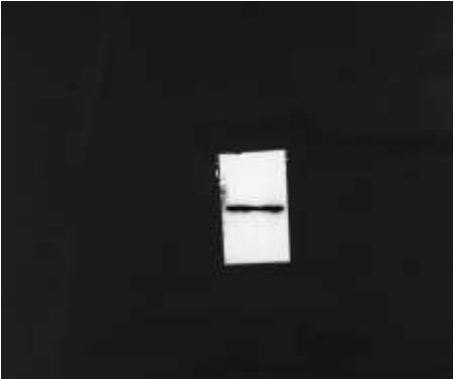

$\beta$ -actin

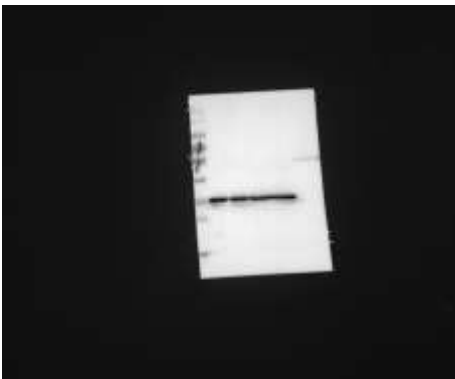

STING

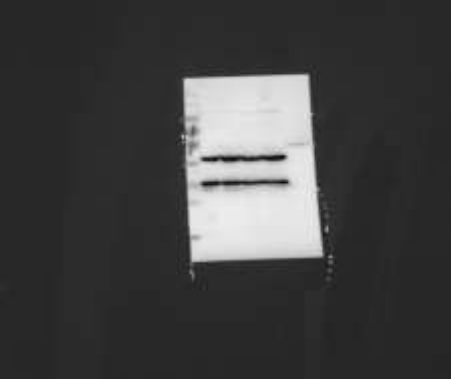

$\beta$ -actin

Figure 4L

CON CON FAC FAC

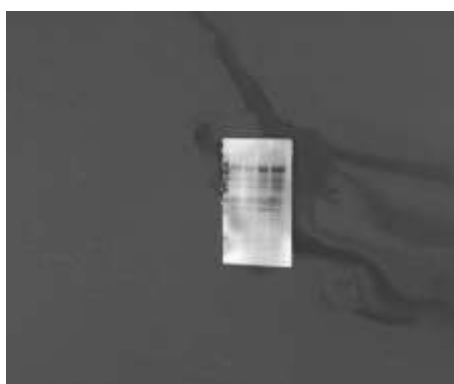

p-TBK1

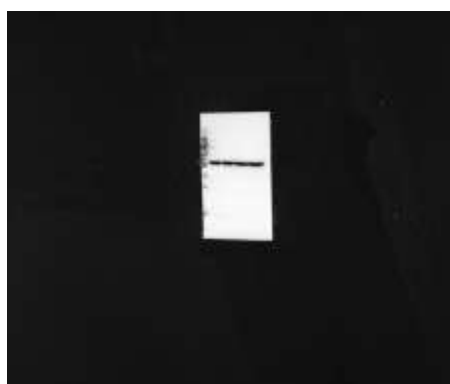

$\beta$ -actin

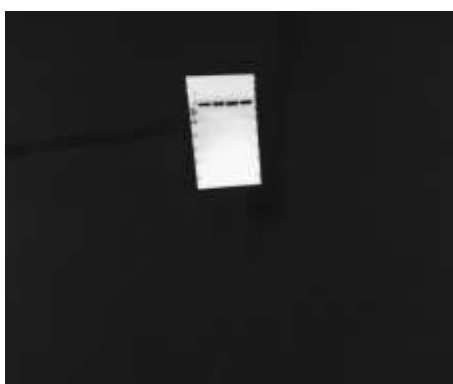

TBK1

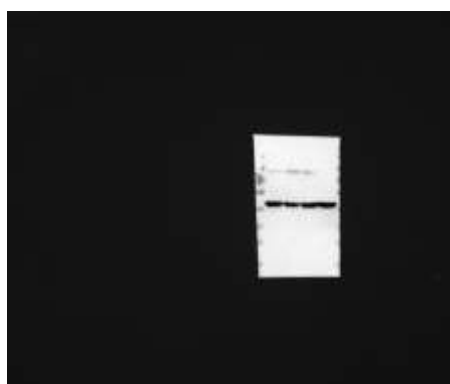

$\beta$ -actin

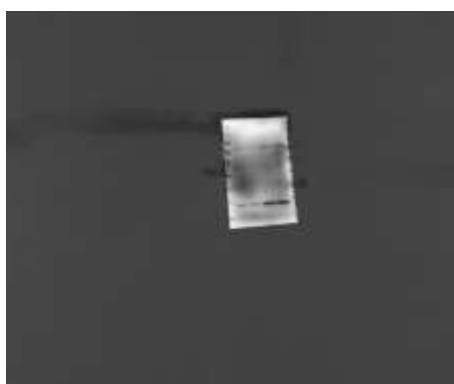

p-NFkB

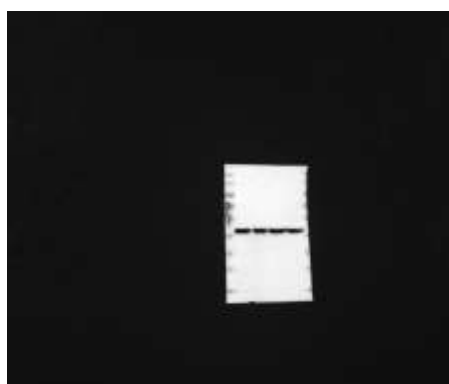

$\beta$ -actin

Figure 4L

CON CON FAC FAC

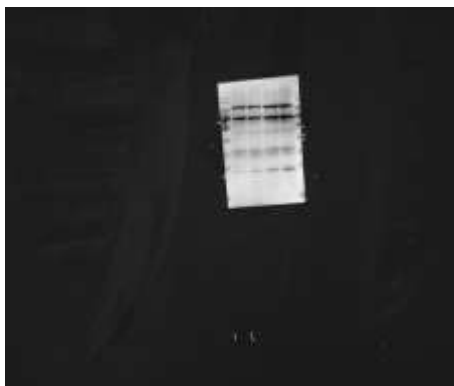

NFκB

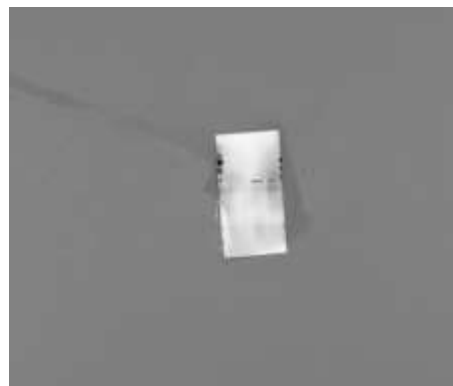

p-IRF3

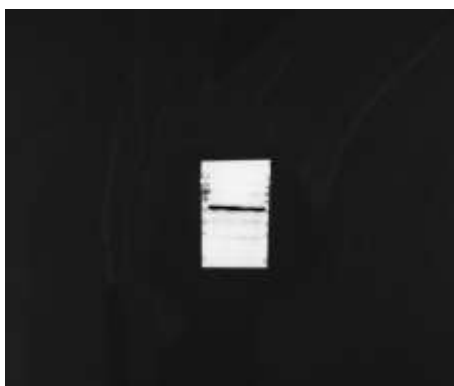

β-actin

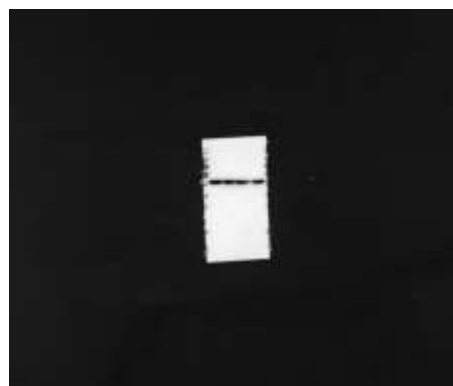

β-actin

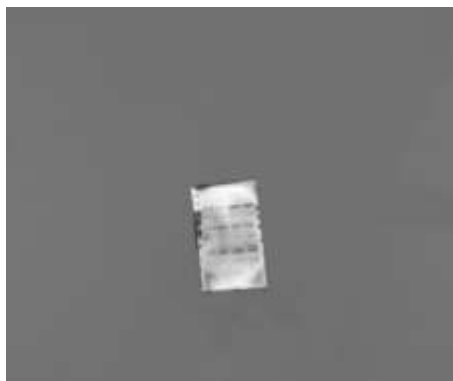

IFN-β

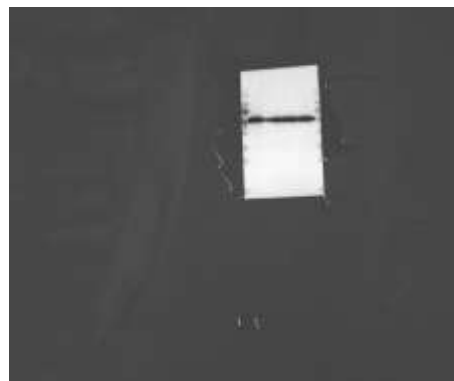

IRF3

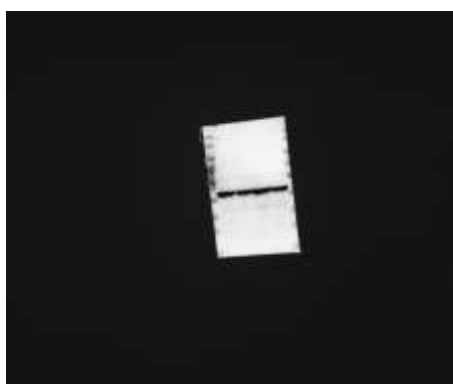

β-actin

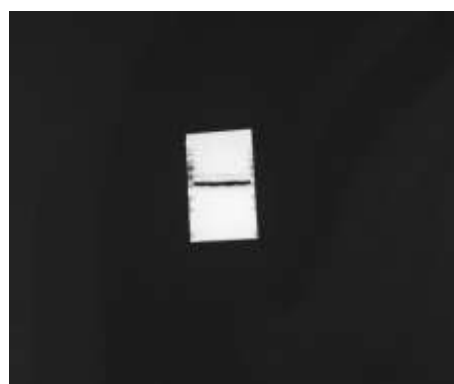

β-actin

Figure 5l

CON FAC

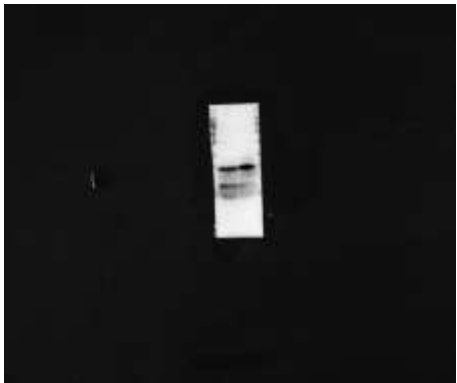

IFN-β

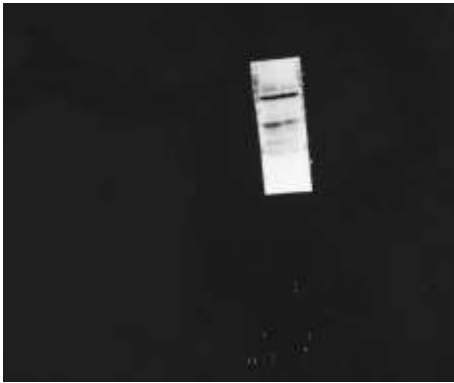

β-actin

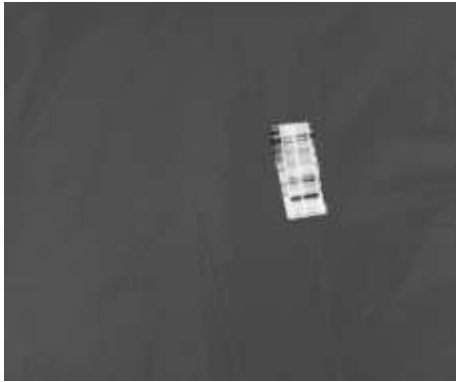

TNF-α

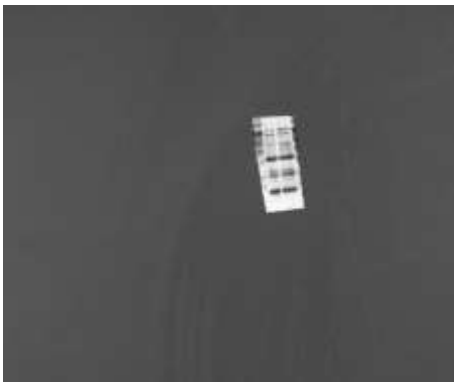

β-actin

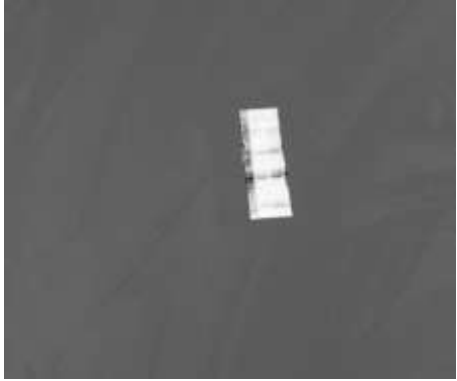

IL-6

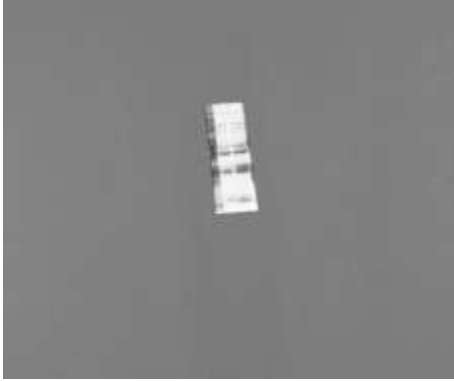

β-actin



**Figure 5J**

CON FAC

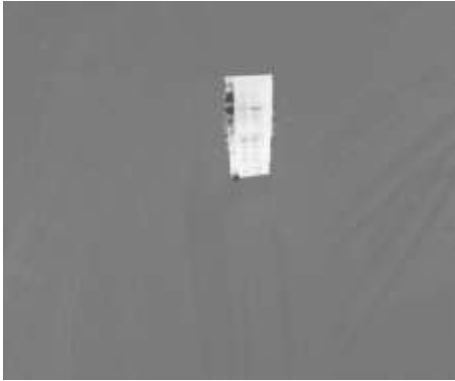

cGAS

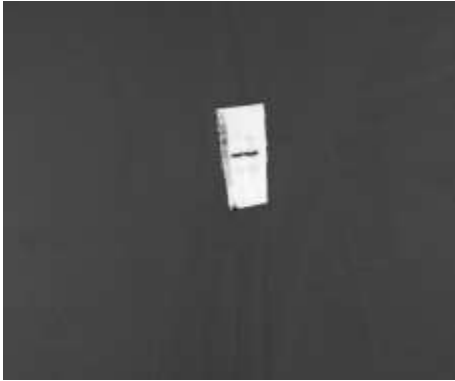

$\beta$ -actin

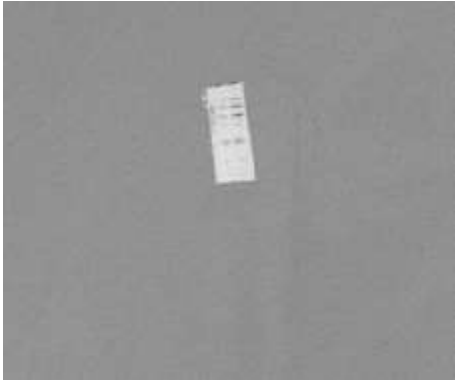

p-STING

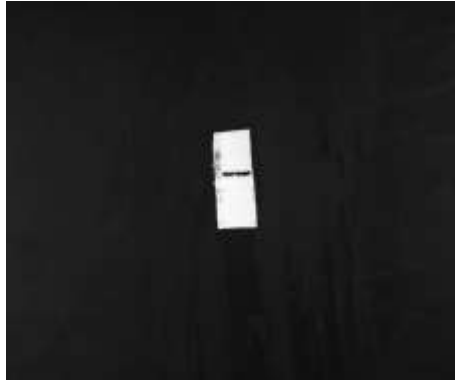

$\beta$ -actin

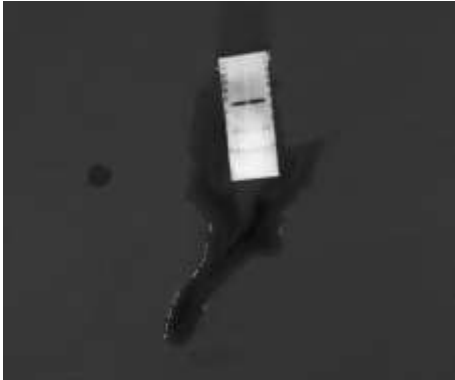

STING

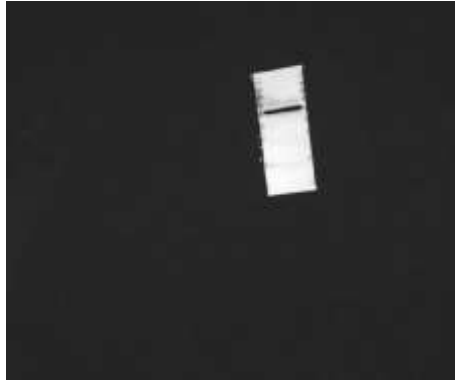

$\beta$ -actin

Figure 6H

CON D-gal

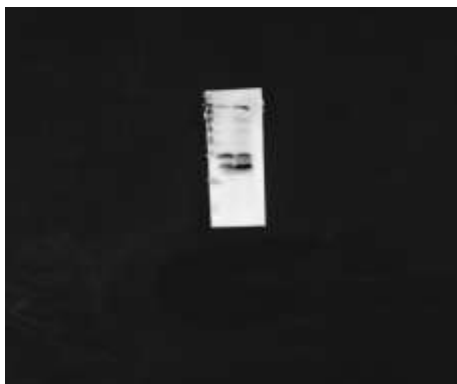

NCOA4

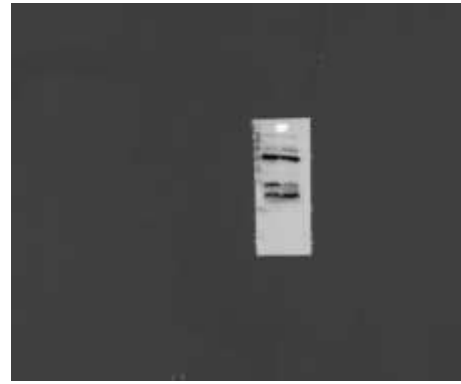

$\beta$ -actin

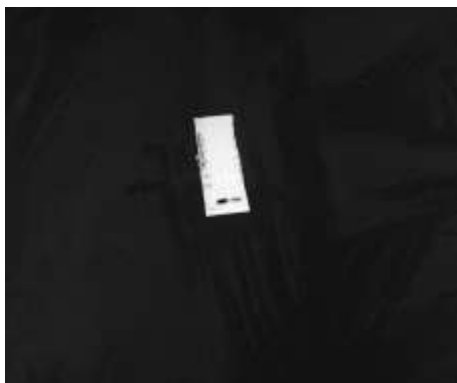

Ferritin

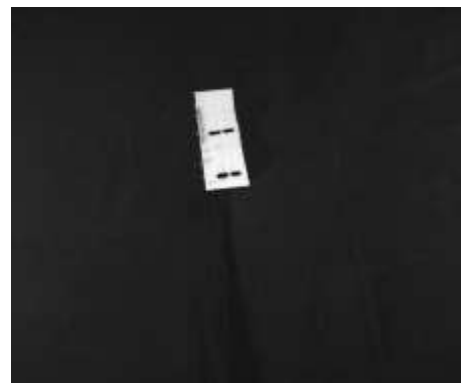

$\beta$ -actin

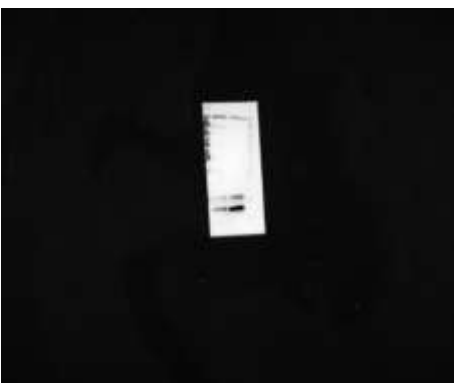

LC3B

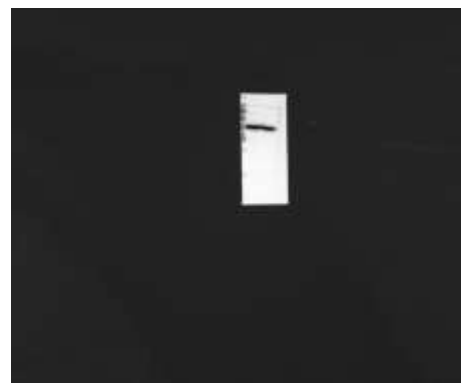

$\beta$ -actin

**Figure 6H**

CON D-gal

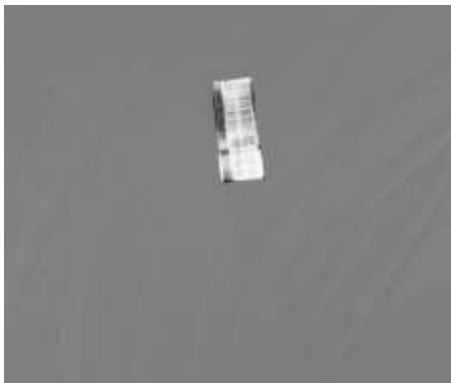

cGAS

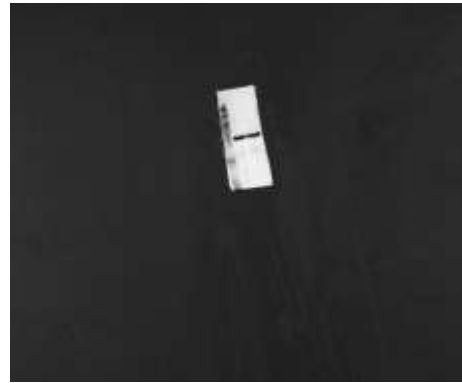

$\beta$ -actin

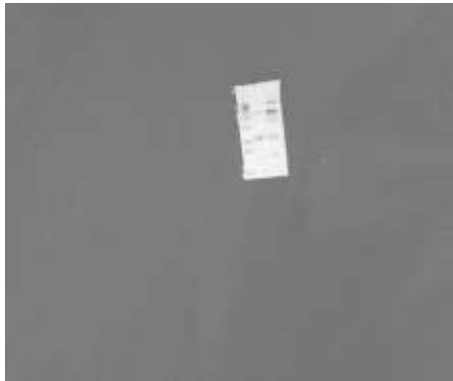

p-STING

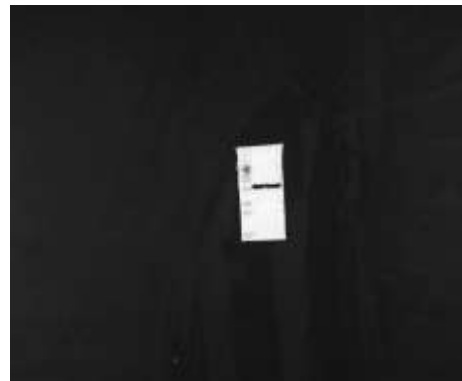

$\beta$ -actin

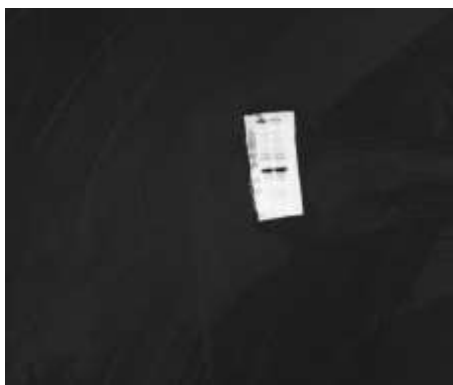

STING

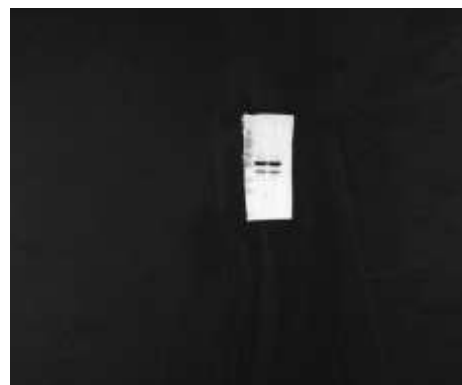

$\beta$ -actin

Figure S6A

CON CON TBH TBH TBH+Mito-T TBH+Mito-T

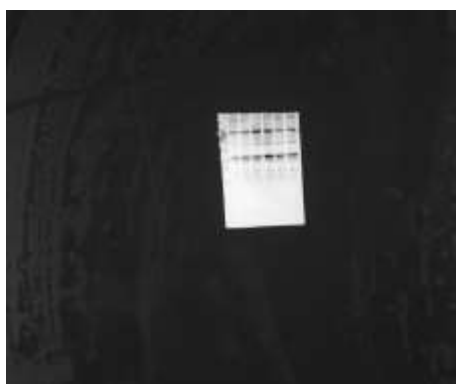

NCOA4

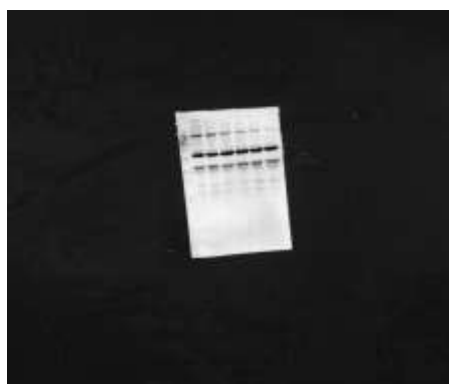

$\beta$ -actin

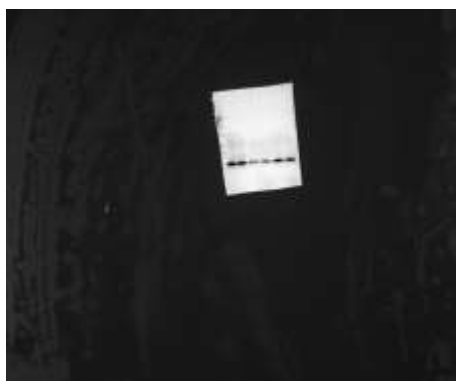

Ferritin

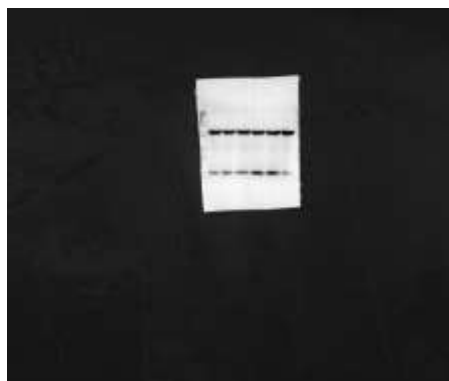

$\beta$ -actin
